# Supplementary material
Source: MDPI journal article supplement (https://www.mdpi.com/2297-8739/9/11/324)
Supplement: s1 [file s1]

**Supplementary Table S1.** RNA yield obtained from various types of tissue when using TissueLyser rather than pestle grinding. Tissue was disrupted using TissueLyser II apparatus (QIAGEN), either in RLT buffer (*Protocol\_O*) or in QIAzol (*Protocol\_PC\_O*).

| Type of starting material      | Method of tissue disruption | Protocol used        | RNA concentration measured by NanoDrop (ng/ $\mu$ L) |
|--------------------------------|-----------------------------|----------------------|------------------------------------------------------|
| Mouse skin biopsy, sample no.1 | TissueLyser                 | <i>Protocol_O</i>    | 1.37                                                 |
| Mouse skin biopsy, sample no.2 | TissueLyser                 | <i>Protocol_O</i>    | 5.65                                                 |
| Pig skin biopsy, sample no.1   | TissueLyser                 | <i>Protocol_O</i>    | 2.53                                                 |
| Pig skin biopsy, sample no.2   | TissueLyser                 | <i>Protocol_O</i>    | 1.98                                                 |
| Mouse skin biopsy, sample no.1 | TissueLyser                 | <i>Protocol_PC+O</i> | 84.25                                                |
| Mouse skin biopsy, sample no.2 | TissueLyser                 | <i>Protocol_PC+O</i> | 392.46                                               |
| Pig skin biopsy, sample no.1   | TissueLyser                 | <i>Protocol_PC+O</i> | 102.84                                               |
| Pig skin biopsy, sample no.2   | TissueLyser                 | <i>Protocol_PC+O</i> | 237.74                                               |
| Human breast cancer tissue     | TissueLyser                 | <i>Protocol_O</i>    | 14.09                                                |
| Human breast cancer tissue     | TissueLyser                 | <i>Protocol_PC+O</i> | 106.57                                               |

**Supplementary Table S2.** List of TaqMan gene expression assays, used in the analysis of low abundant transcripts

| Gene of interest | Assay ID      |
|------------------|---------------|
| <i>CDKN1A</i>    | Hs00355782_m1 |
| <i>Gli1</i>      | Hs01110766_m1 |
| <i>IL-8</i>      | Hs00174103_m1 |
| <i>Hes5</i>      | Hs01387463_g1 |
| <i>Rad51</i>     | Hs00947967_m1 |
| <i>MYC</i>       | Hs00153408_m1 |
| <i>TP53</i>      | Hs01034249_m1 |
| <i>USP2</i>      | Hs00275859_m1 |

**Supplementary Table S3.** Analysis of low-abundant transcripts in samples extracted with *Protocol\_O* and *Protocol\_P*. Color-coded fields inform about the expression levels and thus feasibility of the assay (green – both samples from the sample pair *Protocol\_O-Protocol\_P* with Ct values not higher than Ct = 35; orange – at least one sample in the pair resulted in Ct >35; red – at least one sample in the pair resulted with no signal).

| Gene name    | Sample name   |                |               |               |              |              |                | No. of sample pair analyzed | Mean difference (Ct) | p-value (paired t-test) |
|--------------|---------------|----------------|---------------|---------------|--------------|--------------|----------------|-----------------------------|----------------------|-------------------------|
|              | 98_<br>rectum | 105_<br>testis | 42_<br>breast | 47_<br>breast | 93_<br>colon | 5_<br>testis | 102_<br>uterus |                             |                      |                         |
| <i>CDKN1</i> |               | >35            | >35           | No Ct         |              | >35          |                | n = 6                       | 0.80                 | 0.06                    |
| <i>Gli1</i>  | No Ct         | No Ct          | No Ct         | No Ct         | >35          | >35          | >35            | n = 3                       | 0.38                 | 0.46                    |
| <i>IL-8</i>  |               | No Ct          | >35           | No Ct         |              | >35          | >35            | n = 5                       | 0.91                 | 0.11                    |
| <i>Hes5</i>  | >35           | No Ct          | No Ct         | No Ct         | >35          | >35          | >35            | n = 3                       | 0.62                 | 0.13                    |
|              | 97_<br>rectum | 106_<br>testis | 41_<br>breast | 48_<br>breast | 94_<br>colon | 6_<br>testis | 101_<br>uterus |                             |                      |                         |
| <i>Rad51</i> |               |                | No Ct         | No Ct         |              |              | >35            | n = 5                       | 0.77                 | 0.12                    |
| <i>MYC</i>   |               | >35            | >35           | No Ct         |              | >35          | >35            | n = 6                       | 0.57                 | 0.27                    |
| <i>TP53</i>  |               |                | >35           | No Ct         |              |              |                | n = 6                       | 0.87                 | 0.10                    |
| <i>USP2</i>  |               | No Ct          | No Ct         | No Ct         |              |              | >35            | n = 4                       | -0.08 *              | 0.95                    |

\* minus sign means that samples extracted with Protocol\_P had on average lower Ct values
