# Supplementary material
Source: MDPI journal article supplement (https://www.mdpi.com/2297-8739/9/11/324)
Supplement: s1 [file s1]

## Supplementary Figures Legends

**Supplementary Figure S1.** Two techniques of quantification of nucleic acid concentration – fluorometric based using Qubit and spectrophotometric using NanoDrop – give similar results for both RNA and DNA irrespective of extraction method. **(A)** Concentration of RNA, extracted with *Protocol\_O*. **(B)** Concentration of RNA, extracted with *Protocol\_P*. **(C)** Concentration of DNA, extracted with *Protocol\_O*. **(D)** Concentration of DNA, extracted with *Protocol\_P*.

**Supplementary Figure S2.** 260/230 ratio does not differ significantly between samples isolated with protocols *O* and *P*, and is positively correlated with amounts of purified nucleic acids. **(A)**. Comparison between 260/230 ratios for RNA, isolated with *Protocol\_O* versus *Protocol\_P*. Pooled data from all samples, irrespective of the organ of origin. Statistic comparison was performed only if samples isolated with both protocols were available ( $n = 20/28$ ; paired t-test,  $p = 0.215$ ) **(B)**. Comparison between 260/230 ratios for DNA, isolated with *Protocol\_O* versus *Protocol\_P*. Pooled data from all samples, irrespective of the organ of origin. Statistic comparison was performed only if samples isolated with either protocol were available ( $n = 28/28$ ; paired t-test,  $p = 0.497$ ). **(C)**. Linear correlation between 230/260 ratios and RNA concentration, irrespective of the purification protocol used and organ of origin. **(D)**. Linear correlation between 230/260 ratios and RNA concentration, irrespective of the purification protocol used and organ of origin.

**Supplementary Figure S3.** Suitability of samples extracted with *Protocol\_P* for RT-qPCR. Comparison of expression of *ACTB* using RNA extracted with **(A)** *Protocol\_PC+O* versus *Protocol\_P* (phenol-chloroform extraction) and **(B)** *Protocol\_O* versus *Protocol\_P*. **(C)** Linear correlation between the percentage share of 5S peak and the difference between RT-qPCR outcome (Ct) between samples isolated with *Protocol\_O* versus *Protocol\_P*.

**Supplementary Figure S4.** Analysis of levels of low-abundant transcripts, using RNA extracted with *Protocol\_O* versus *Protocol\_P*. Samples where no transcript was detected were given a Ct = 41 for illustrative purposes. Horizontal line on the graph refers to the last amplification cycle, Ct = 40. **(A)** *CDKN1A*, **(B)** *Gli1*, **(C)** – *IL-8*, **(D)** – *Hes5*, **(E)** – *Rad51*, **(F)** – *MYC*, **(G)** – *TP53*, **(H)** – *USP2* (All gene expression assays are from Applied Biosystems; a detailed list can be found in supplementary table S3).
