# Supplementary material
Source: MDPI journal article supplement (https://www.mdpi.com/2297-8739/9/11/324)
Supplement: s1 [file s1]

Archive with 6 entries (6 files):
- Supplementary Figures Legends.pdf
- Supplementary_tables.pdf
- Suppl_fig_S1.tif
- Suppl_fig_S2.tif
- Suppl_fig_S3.tif
- Suppl_fig_S4.tif
