# Supplementary material
Source: MDPI journal article supplement (https://www.mdpi.com/2297-8739/9/11/324)

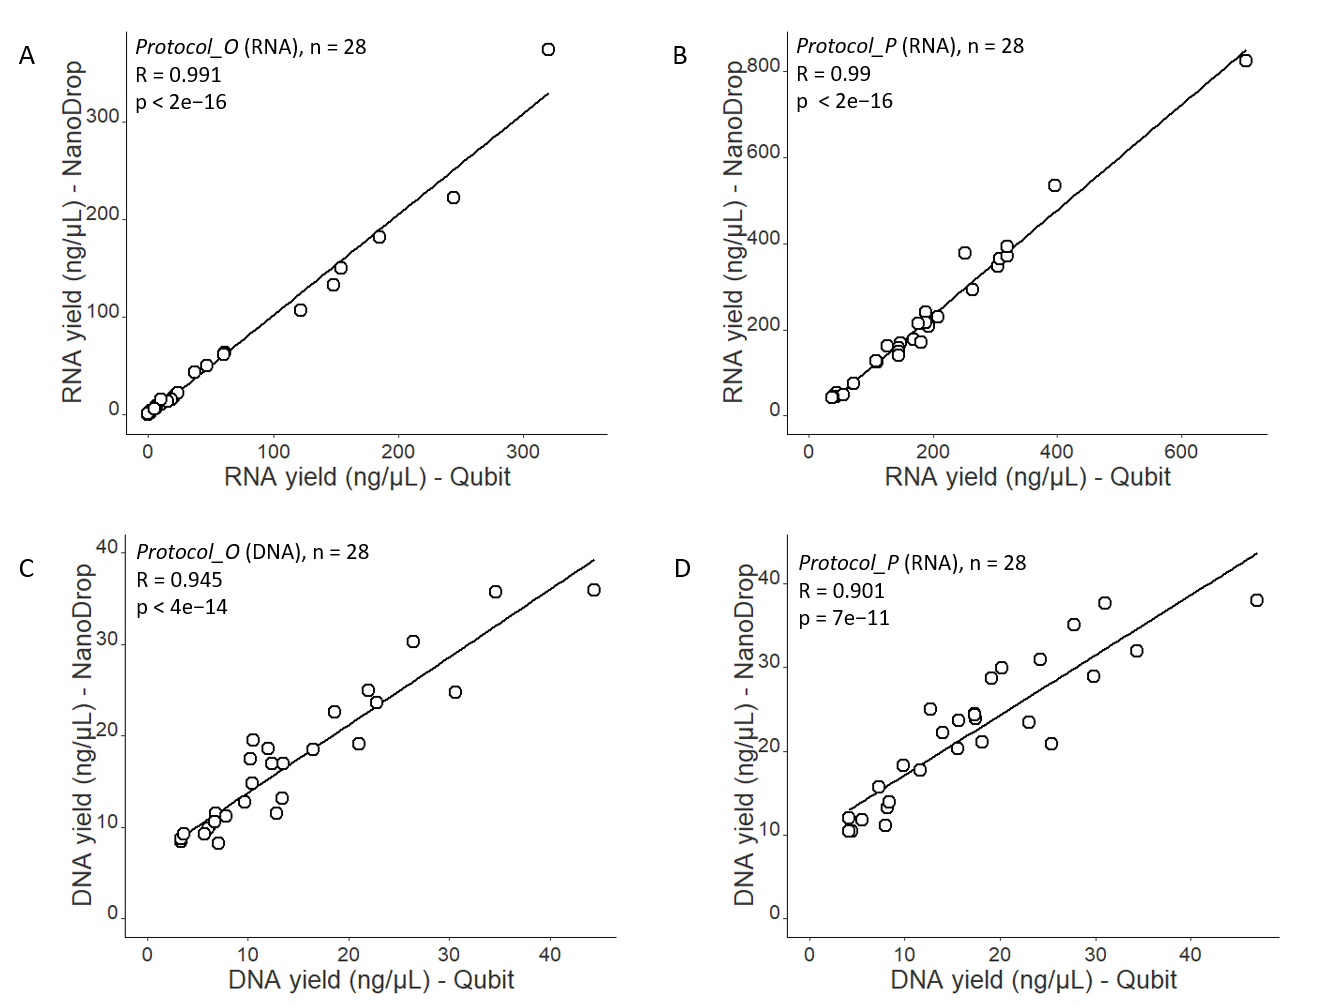

Supplement: s1 [file s1 › Suppl_fig_S1.tif]

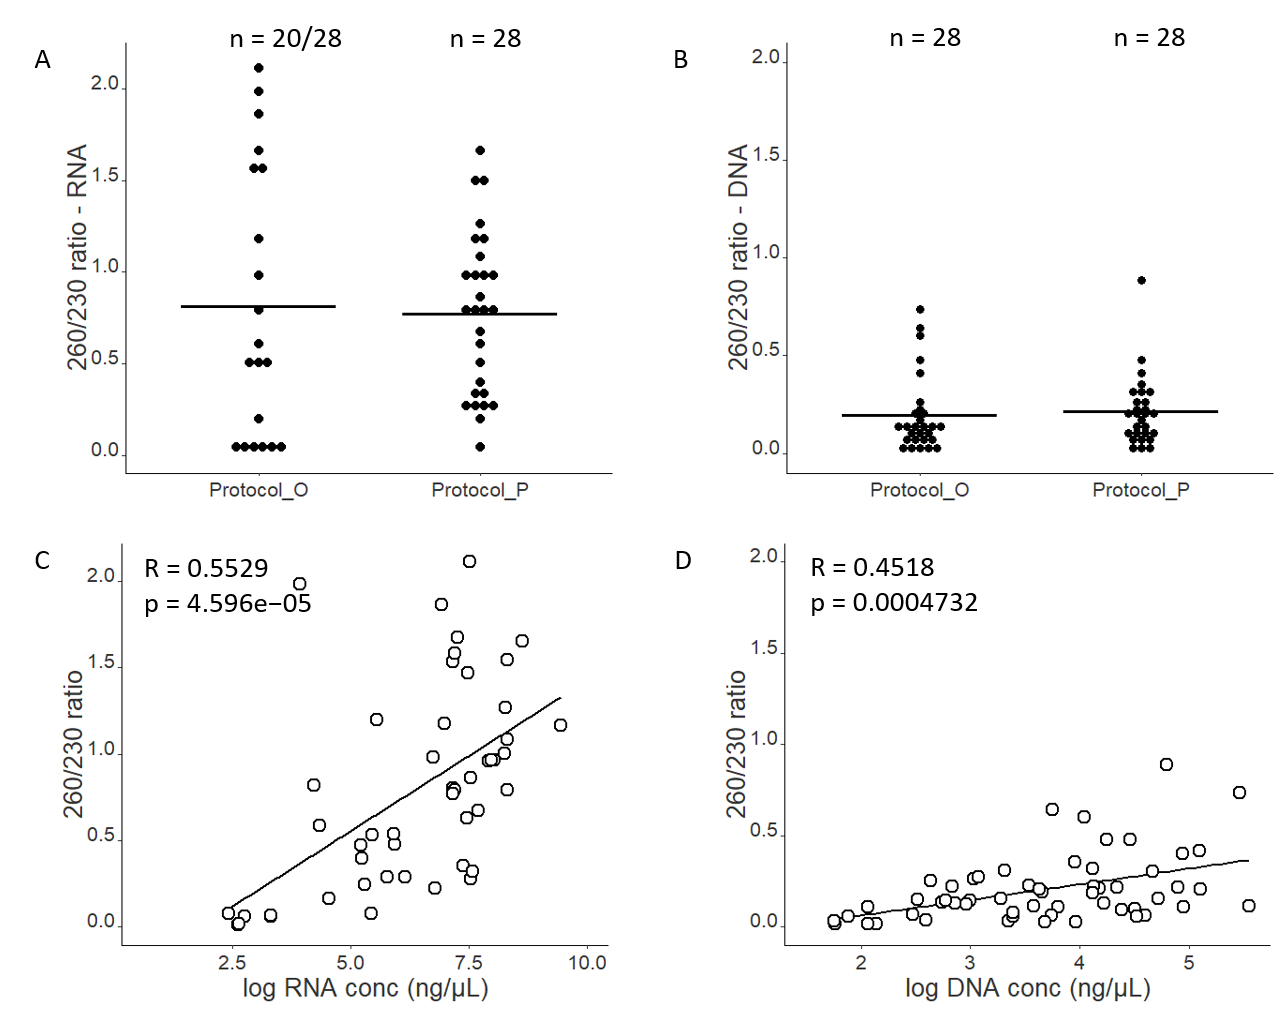

Supplement: s1 [file s1 › Suppl_fig_S2.tif]

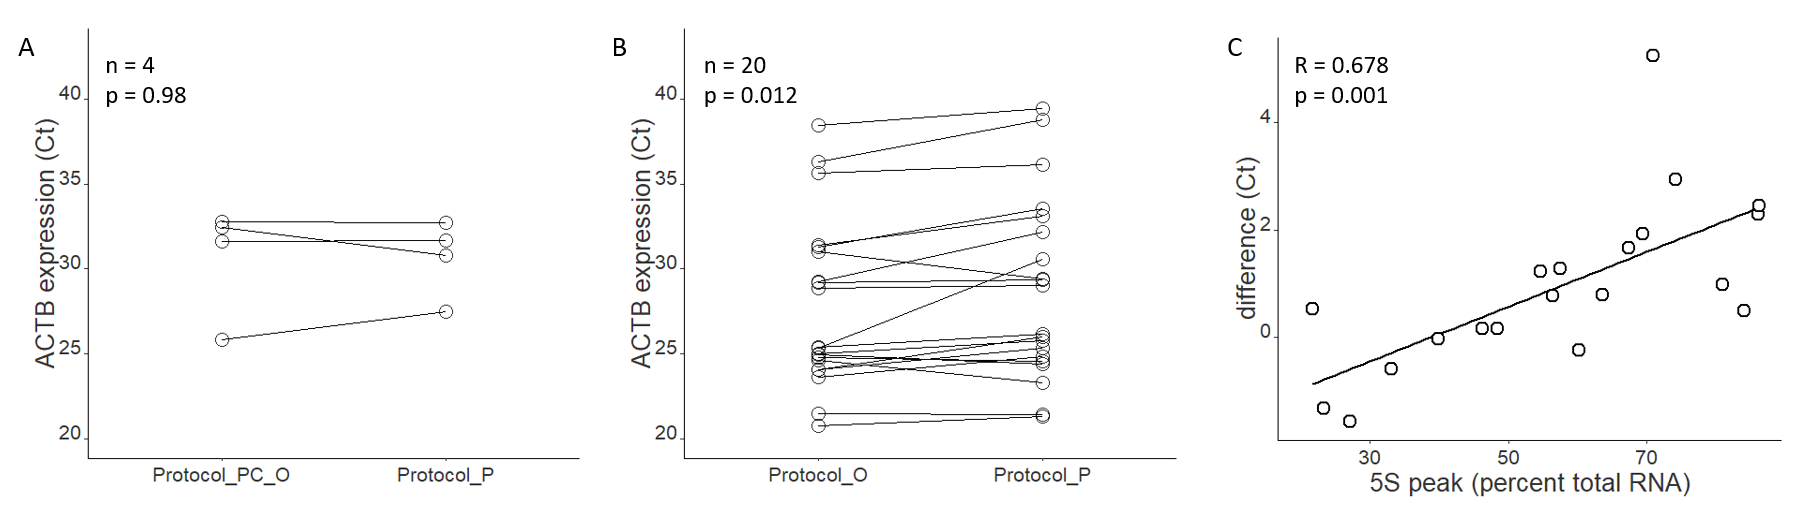

Supplement: s1 [file s1 › Suppl_fig_S3.tif]

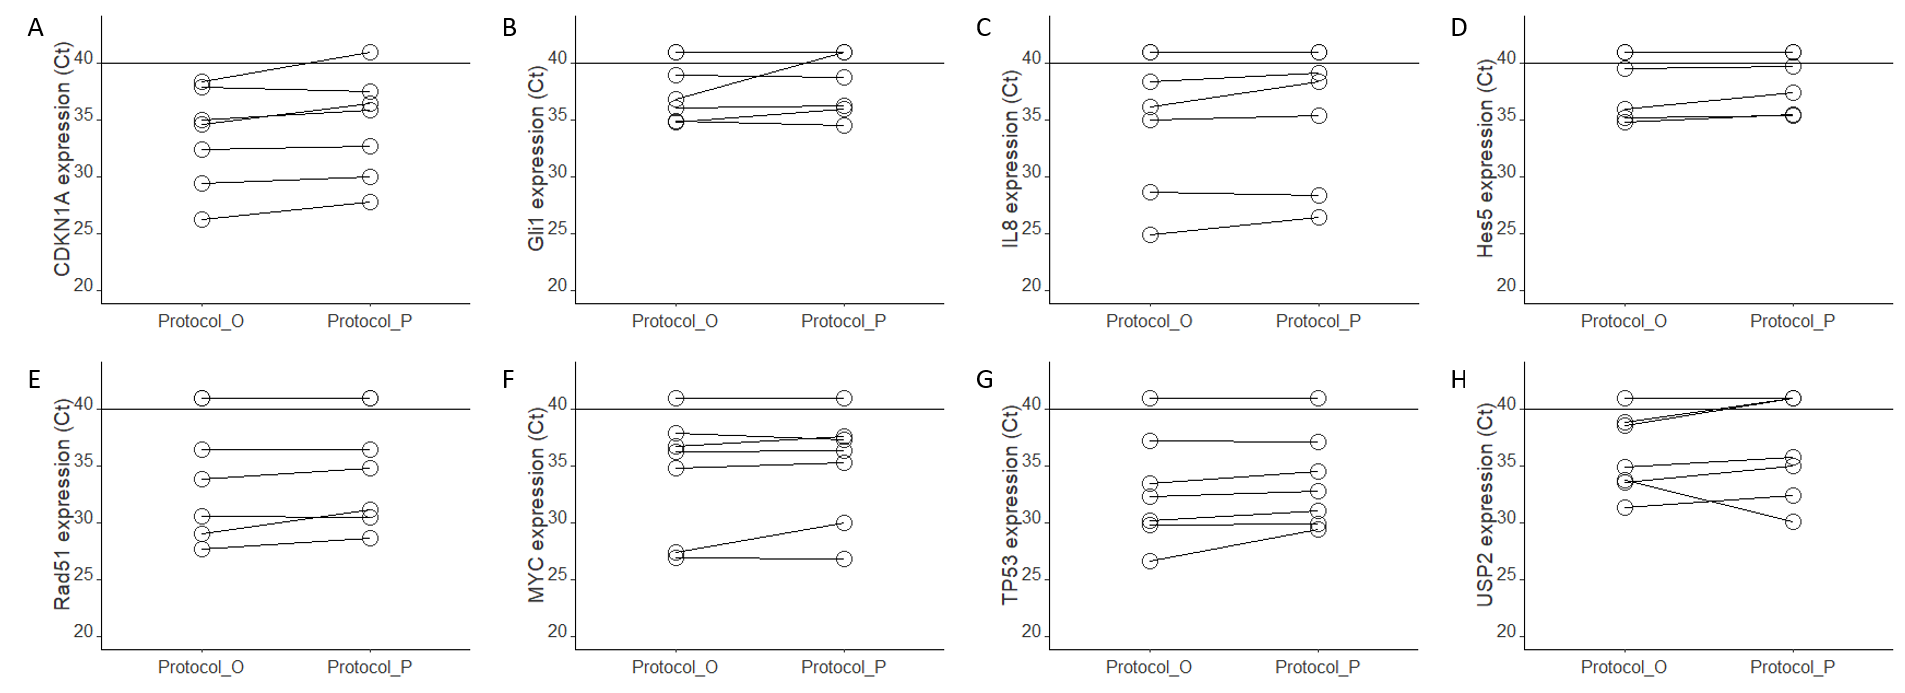

Supplement: s1 [file s1 › Suppl_fig_S4.tif]
